# Supplementary material for: Novel Bi12ZnO20–Bi2WO6 heterostructures: facile synthesis and excellent visible-light-driven photocatalytic activities
Source: Royal Society of Chemistry journal article supplement (doi:10.1039/c5ra01327e), 2015-01-01
Supplement: c5ra01327e1.pdf [file c5ra01327e1.pdf]

## Electronic supplementary information

### Novel $\text{Bi}_{12}\text{ZnO}_{20}\text{-Bi}_2\text{WO}_6$ Heterostructures: Facile Synthesis and Excellent Visible-Light-Driven Photocatalytic Activities

Lei Zhang,<sup>a,b</sup> Xiang Zhang,<sup>a</sup> Yu-Qi Huang,<sup>a</sup> Cheng-Ling Pan,<sup>\*a,b</sup> Jin-Song Hu,<sup>\*a</sup> and Chang-Min Hou<sup>b</sup>

<sup>a</sup> Laboratory of Multiscale Materials and Molecular Catalysis, School of Materials Science and Engineering, Anhui University of Science and Technology, Huainan, Anhui 232001, P. R. China

E-mail: clpan@aust.edu.cn; jshu@aust.edu.cn

<sup>b</sup> State Key Lab of Inorganic Synthesis & Preparative Chemistry, College of Chemistry, Jilin University, Changchun 130012, P. R. China

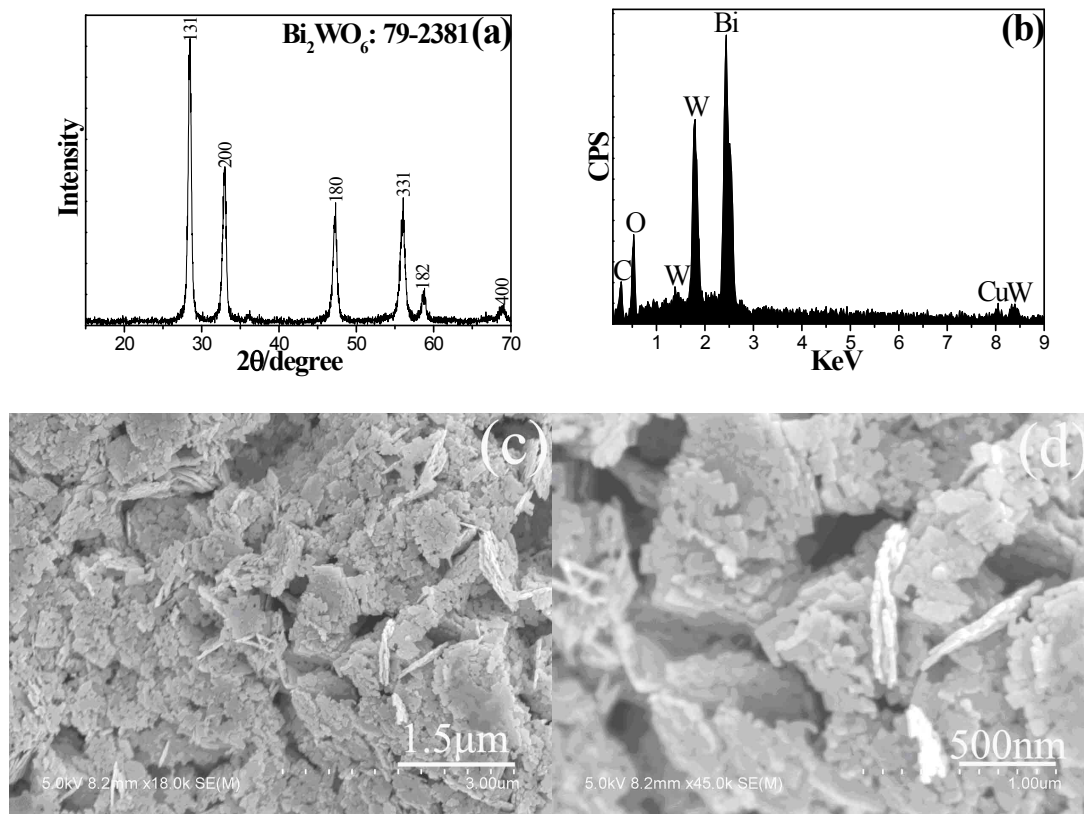

Fig. S1 XRD pattern (a), EDS spectrum (b) and (c, d) SEM images of as-prepared BWO sample.

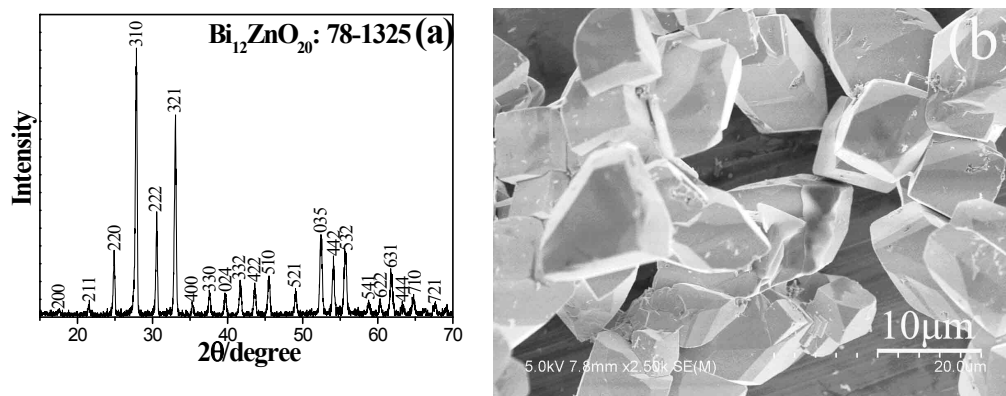

**Fig. S2** XRD pattern and SEM image of BZO microcrystals prepared under hydrothermal synthesis method.

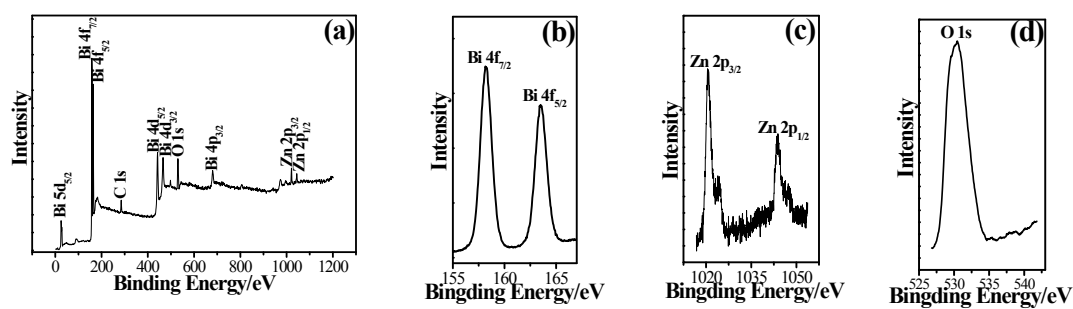

**Fig. S3** XPS spectra of BZO microcrystals prepared under hydrothermal synthesis method.

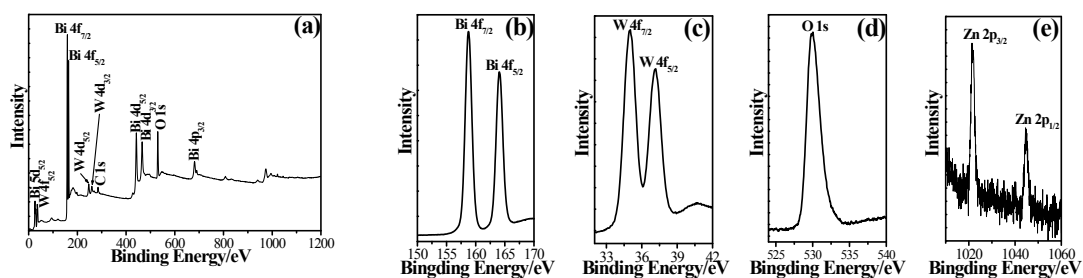

**Fig. S4** XPS spectra of BZO (BZO/BWO = 30%, wt%)-BWO heterostructures prepared under hydrothermal synthesis method.

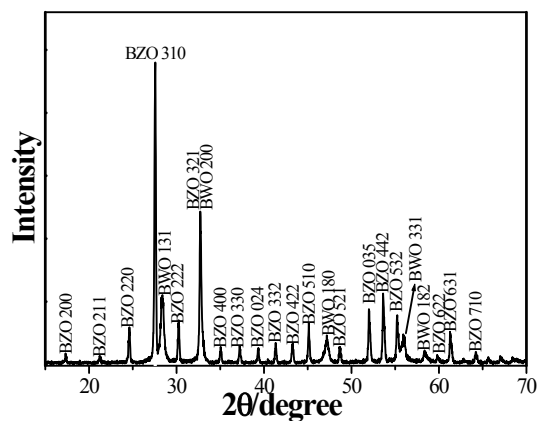

**Fig. S5** XRD pattern of BZO (BZO/BWO = 30%, wt%)-BWO heterostructures prepared under hydrothermal synthesis method.

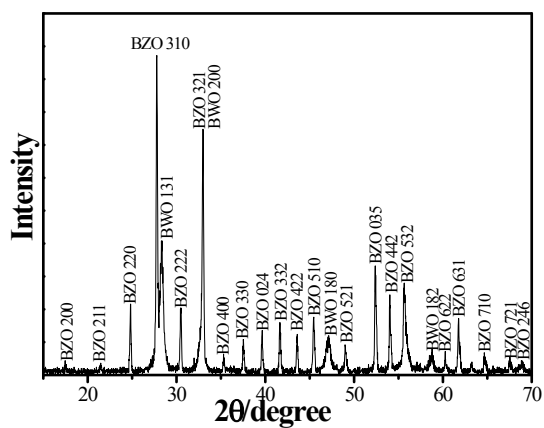

**Fig. S6** XRD pattern of BZO-BWO composite photocatalyst (BZO + BWO) by physical mixture of pure BZO and BWO.
